# Supplementary material
Source: PubMed Central journal article supplement (PMC3436964)
Supplement: NIHMS375958-supplement-1.pdf [file NIHMS375958-supplement-1.pdf]

**Appendix B, Supplementary Tables**

Table S1

*Trim and Fill Analyses*

| Measure                               | Studies Trimmed | Adjusted <i>d</i> | 95% Confidence Interval |             | Q      |
|---------------------------------------|-----------------|-------------------|-------------------------|-------------|--------|
|                                       |                 |                   | Lower Limit             | Upper Limit |        |
| <b>Inhibition:</b>                    |                 |                   |                         |             |        |
| Stroop Incongruent                    | 6               | 0.58              | 0.41                    | 0.75        | 70.40  |
| Stroop Neutral (Comparison Condition) | 5               | 0.49              | 0.34                    | 0.64        | 31.37  |
| Stroop Interference                   | 3               | 0.30              | 0.14                    | 0.47        | 57.42  |
| Stroop accuracy                       | 4               | 0.50              | 0.25                    | 0.74        | 30.32  |
| Hayling                               | 0               | 0.97              | 0.54                    | 1.40        | 9.23   |
| Inhibition Comp.                      | 13              | 0.42              | 0.30                    | 0.54        | 189.26 |
| <b>Shifting:</b>                      |                 |                   |                         |             |        |
| WCST                                  | 6               | 0.35              | 0.19                    | 0.50        | 81.81  |
| TMT-B                                 | 8               | 0.43              | 0.27                    | 0.58        | 168.00 |
| TMT-A (Comparison Condition)          | 9               | 0.35              | 0.20                    | 0.50        | 158.07 |
| ID/ED Shift                           | 4               | 0.35              | 0.19                    | 0.52        | 30.88  |
| Shifting Comp.                        | 14              | 0.36              | 0.27                    | 0.45        | 218.84 |
| <b>Updating:</b>                      |                 |                   |                         |             |        |
| n-Back                                | 0               | 0.63              | 0.11                    | 1.15        | 27.02  |
| Updating Comp.                        | 0               | 0.57              | 0.20                    | 0.94        | 35.22  |
| <b>Verbal Working Memory:</b>         |                 |                   |                         |             |        |
| Forward Digit Span                    | 0               | 0.39              | 0.25                    | 0.53        | 47.55  |
| Backward Digit Span                   | 0               | 0.55              | 0.39                    | 0.71        | 49.30  |
| Maintenance Comp.                     | 10              | 0.23              | 0.10                    | 0.37        | 101.85 |
| Manipulation Comp.                    | 0               | 0.52              | 0.38                    | 0.66        | 55.86  |
| Verbal WM Comp.                       | 0               | 0.45              | 0.34                    | 0.56        | 65.60  |
| <b>Visuospatial Working Memory:</b>   |                 |                   |                         |             |        |
| DMTS                                  | 3               | 0.23              | 0.05                    | 0.42        | 17.67  |
| Self-Ordered Pointing                 | 1               | 0.33              | 0.11                    | 0.55        | 20.20  |
| Forward Spatial Span                  | 0               | 0.36              | 0.17                    | 0.55        | 33.40  |
| Backward Spatial Span                 | 1               | 0.63              | 0.26                    | 1.00        | 37.73  |
| Visuospatial WM Comp.                 | 7               | 0.29              | 0.13                    | 0.46        | 73.81  |
| <b>Planning:</b>                      |                 |                   |                         |             |        |
| Planning Comp.                        | 5               | 0.26              | 0.10                    | 0.42        | 39.04  |
| <b>Verbal Fluency:</b>                |                 |                   |                         |             |        |
| Semantic VF                           | 6               | 0.53              | 0.34                    | 0.72        | 110.44 |
| Phonemic VF                           | 9               | 0.33              | 0.21                    | 0.46        | 121.90 |
| VF Comp.                              | 10              | 0.42              | 0.30                    | 0.54        | 159.82 |
| <b>Comparison Measures:</b>           |                 |                   |                         |             |        |
| Psychomotor Speed Comp.               | 5               | 0.20              | 0.03                    | 0.38        | 97.38  |
| Digit-Symbol Substitution             | 0               | 0.55              | 0.34                    | 0.75        | 88.76  |

|            |   |      |       |      |       |
|------------|---|------|-------|------|-------|
| Vocabulary | 6 | 0.08 | -0.03 | 0.18 | 64.68 |
|------------|---|------|-------|------|-------|

*Note.* Comp. = composite score; WCST= Wisconsin Card Sorting Test; TMT-B = Trail Making Test part B; TMT-A = Trail Making Test part A;

ID/ED = Intradimensional/Extradimensional; WM = working memory; DMTS = delayed-match-to-sample; VF= verbal fluency.

Table S2

*Descriptive Statistics for Demographic Factors*

| Analysis                  | Severity (SD)          | Age (SD)    | % Medicated (SD)           | Education matching % |      |      | IQ matching % |      |      |
|---------------------------|------------------------|-------------|----------------------------|----------------------|------|------|---------------|------|------|
|                           |                        |             |                            | M                    | UM   | NR   | M             | UM   | NR   |
| Inhibition Comp.          | 1.8 (1.2) <sup>1</sup> | 45.2 (16.2) | 53.9 (41.4) <sup>4</sup>   | 77.6                 | 16.3 | 6.1  | 36.7          | 12.2 | 51.0 |
| Stroop Incongruent        | 2.0 (1.2)              | 43.4 (8.5)  | 48.8.0 (42.9) <sup>1</sup> | 73.7                 | 21.1 | 5.3  | 63.2          | 21.1 | 15.8 |
| Stroop Neutral            | 2.2 (1.0)              | 45.1 (9.0)  | 51.1 (44.4) <sup>1</sup>   | 64.3                 | 21.4 | 14.3 | 50.0          | 21.4 | 28.6 |
| Stroop Interference       | 1.8 (1.1) <sup>1</sup> | 45.2 (16.5) | 54.6 (46.5) <sup>2</sup>   | 75.0                 | 20.0 | 5.0  | 40.0          | 10.0 | 50.0 |
| Stroop Accuracy           | 2.2 (1.1)              | 49.4 (18.6) | 63.0 (38.7) <sup>1</sup>   | 80.0                 | 10.0 | 10.0 | 10.0          | 10.0 | 80.0 |
| Hayling                   | 1.6 (1.5)              | 54.6 (18.4) | 68.8 (41.3)                | 60.0                 | 20.0 | 20.0 | 40.0          | 0.0  | 60.0 |
| Shifting Comp.            | 2.1 (1.2) <sup>7</sup> | 45.3 (16.4) | 52.8 (44.1) <sup>9</sup>   | 82.6                 | 8.7  | 8.7  | 50.7          | 7.2  | 42.0 |
| WCST                      | 2.2 (1.0) <sup>2</sup> | 46.4 (16.1) | 53.9 (45.5) <sup>1</sup>   | 88.0                 | 12.0 | 0.0  | 48.0          | 12.0 | 40.0 |
| TMT-B                     | 2.2 (1.1) <sup>2</sup> | 45.9 (17.4) | 40.6 (41.1) <sup>7</sup>   | 80.0                 | 11.4 | 8.6  | 48.6          | 5.7  | 45.7 |
| TMT-A                     | 2.0 (1.2) <sup>2</sup> | 46.9 (14.7) | 44.6 (42.7) <sup>9</sup>   | 84.4                 | 6.2  | 9.4  | 50.0          | 12.5 | 37.5 |
| ID/ED Shift               | 2.7 (0.9) <sup>2</sup> | 41.7 (15.3) | 57.9 (47.2) <sup>2</sup>   | 92.3                 | 7.7  | 13.3 | 66.7          | 0.0  | 33.3 |
| n-Back                    | 2.9 (0.2)              | 43.1 (12.6) | 59.4 (39.3)                | 85.7                 | 14.3 | 0.0  | 42.9          | 0.0  | 57.1 |
| Updating Comp.            | 2.6 (0.9)              | 48.5 (15.7) | 63.4 (37.4)                | 90.0                 | 10.0 | 0.0  | 30.0          | 0.0  | 70.0 |
| Verbal WM Comp.           | 2.0 (1.2) <sup>3</sup> | 47.3 (16.6) | 59.0 (43.4) <sup>5</sup>   | 89.7                 | 7.7  | 2.5  | 53.8          | 15.4 | 30.8 |
| Forward Digit Span        | 2.1 (1.2) <sup>1</sup> | 45.2 (15.5) | 50.35 (42.7) <sup>1</sup>  | 92.6                 | 7.4  | 0.0  | 59.3          | 18.5 | 22.2 |
| Backward Digit Span       | 2.5 (1.0) <sup>2</sup> | 42.8 (13.4) | 76.0 (34.0) <sup>1</sup>   | 91.3                 | 4.3  | 4.3  | 56.5          | 17.4 | 26.1 |
| Maintenance Comp.         | 2.0 (1.2) <sup>1</sup> | 46.3 (16.7) | 55.3 (44.3) <sup>1</sup>   | 90.3                 | 6.5  | 3.2  | 58.1          | 16.1 | 25.8 |
| Manipulation Comp.        | 2.3 (1.0) <sup>3</sup> | 45.4 (14.9) | 69.9 (38.2) <sup>4</sup>   | 92.9                 | 3.6  | 3.6  | 50.0          | 14.3 | 35.7 |
| Visuospatial WM Comp.     | 2.2 (1.2) <sup>2</sup> | 43.5 (16.5) | 55.6 (43.4) <sup>4</sup>   | 73.9                 | 8.7  | 17.4 | 69.6          | 0.0  | 30.4 |
| DMTS                      | 2.5 (1.0) <sup>1</sup> | 39.9 (15.3) | 30.3 (42.9) <sup>3</sup>   | 63.6                 | 9.1  | 27.3 | 81.8          | 0.0  | 18.2 |
| Self-Ordered Pointing     | 2.5 (0.9) <sup>1</sup> | 41.8 (16.9) | 44.2 (47.9) <sup>2</sup>   | 75.0                 | 0.0  | 25.0 | 83.3          | 0.0  | 16.7 |
| Forward Spatial Span      | 2.2 (1.2) <sup>2</sup> | 43.4 (17.8) | 49.9 (44.6) <sup>2</sup>   | 72.2                 | 5.6  | 22.2 | 72.2          | 0.0  | 27.8 |
| Backward Spatial Span     | 1.6 (1.3) <sup>1</sup> | 40.3 (13.3) | 68.3 (36.3)                | 88.9                 | 0.0  | 11.1 | 66.7          | 0.0  | 33.3 |
| Planning Comp.            | 2.9 (0.3) <sup>1</sup> | 42.8 (15.3) | 67.4 (42.2) <sup>5</sup>   | 76.5                 | 5.9  | 17.6 | 58.8          | 0.0  | 41.2 |
| VF Comp.                  | 2.1 (1.1) <sup>3</sup> | 51.2 (16.3) | 56.7 (44.2) <sup>10</sup>  | 84.8                 | 10.9 | 4.3  | 45.7          | 8.7  | 45.7 |
| Semantic VF               | 2.3 (1.0)              | 50.0 (15.9) | 73.7 (35.7) <sup>7</sup>   | 87.5                 | 8.3  | 4.2  | 45.8          | 8.3  | 45.8 |
| Phonemic VF               | 2.2 (1.1) <sup>3</sup> | 50.9 (16.3) | 57.1 (45.8) <sup>6</sup>   | 83.8                 | 10.8 | 5.4  | 48.6          | 10.8 | 40.5 |
| Psychomotor Speed Comp.   | 2.1 (1.1) <sup>2</sup> | 41.9 (17.4) | 49.7 (45.4) <sup>3</sup>   | 73.9                 | 13.0 | 13.0 | 47.8          | 0.0  | 52.2 |
| Digit-Symbol Substitution | 2.3 (1.0) <sup>3</sup> | 50.5 (17.6) | 41.7 (40.6) <sup>4</sup>   | 87.0                 | 8.7  | 4.3  | 43.5          | 17.4 | 39.1 |
| Vocabulary                | 1.8 (1.4) <sup>3</sup> | 43.9 (14.6) | 61.6 (41.4) <sup>4</sup>   | 86.1                 | 5.6  | 8.3  | -             | -    | -    |

*Note.* M = matched; UM = unmatched; NR = not reported; Comp. = composite score; WCST= Wisconsin Card Sorting Test; TMT-B = Trail Making Test part B; TMT-A = Trail Making Test part A; ID/ED = Intradimensional/Extradimensional; WM = working memory; DMTS = delayed-match-to-sample; VF = verbal fluency.

<sup>1</sup>Information not reported by 1 study. <sup>2</sup>Information not reported by 2 studies. <sup>3</sup>Information not reported by 3 studies. <sup>4</sup>Information not reported by 4 studies. <sup>5</sup>Information not reported by 5 studies. <sup>6</sup>Information not reported by 6 studies. <sup>7</sup>Information not reported by 7 studies. <sup>8</sup>Information not reported by 8 studies. <sup>9</sup>Information not reported by 9 studies.

Table S3

*Moderator Simple Regression Analyses*

| DV                            | IV         | Beta  | 95% Confidence Interval |             | B      | SE    | p     | K  | N <sub>ps</sub> | Q <sub>bet</sub><br>(df) | Q <sub>witht</sub><br>(df) |
|-------------------------------|------------|-------|-------------------------|-------------|--------|-------|-------|----|-----------------|--------------------------|----------------------------|
|                               |            |       | Lower Limit             | Upper Limit |        |       |       |    |                 |                          |                            |
| <b>Inhibition:</b>            |            |       |                         |             |        |       |       |    |                 |                          |                            |
| Stroop Interference           | Severity   | 0.02  | -0.47                   | 0.51        | 0.006  | 0.072 | .9    | 19 | 1324            | 0.01 (1)                 | 16.21 (17)                 |
|                               | Age        | 0.16  | -0.32                   | 0.63        | 0.003  | 0.005 | .5    | 20 | 1482            | 0.40 (1)                 | 16.34 (18)                 |
|                               | Medication | 0.30  | -0.17                   | 0.76        | 0.002  | 0.002 | .2    | 18 | 1365            | 1.56 (1)                 | 15.59 (16)                 |
| Inhibition Comp.              | Severity   | 0.17  | -0.13                   | 0.46        | 0.052  | 0.046 | .3    | 47 | 3102            | 1.25 (1)                 | 43.45 (45)                 |
|                               | Age        | 0.12  | -0.19                   | 0.42        | 0.003  | 0.003 | .4    | 48 | 3260            | 0.61 (1)                 | 42.97 (46)                 |
|                               | Medication | 0.26  | -0.03                   | 0.55        | 0.003  | 0.001 | .079# | 44 | 3020            | 3.09 (1)                 | 42.06 (42)                 |
| <b>Shifting:</b>              |            |       |                         |             |        |       |       |    |                 |                          |                            |
| WCST                          | Severity   | 0.33  | -0.06                   | 0.71        | 0.127  | 0.076 | .095# | 23 | 1822            | 2.79 (1)                 | 23.45 (21)                 |
|                               | Age        | -0.05 | -0.43                   | 0.33        | -0.001 | 0.005 | .8    | 25 | 1943            | 0.06 (1)                 | 26.08 (18)                 |
|                               | Medication | 0.06  | -0.33                   | 0.44        | 0.000  | 0.002 | .8    | 25 | 1943            | 0.08 (1)                 | 25.96 (23)                 |
| TMT-B                         | Severity   | 0.20  | -0.14                   | 0.53        | 0.079  | 0.068 | .2    | 33 | 2499            | 1.34 (1)                 | 33.16 (31)                 |
|                               | Age        | 0.44  | 0.15                    | 0.74        | 0.011  | 0.004 | .003* | 35 | 2787            | 8.54 (1)                 | 34.92 (33)                 |
|                               | Medication | 0.26  | -0.11                   | 0.62        | 0.003  | 0.002 | .2    | 28 | 2026            | 1.93 (1)                 | 27.11 (26)                 |
| TMT-A (Comparison Condition)  | Severity   | -0.05 | -0.42                   | 0.33        | -0.015 | 0.062 | .8    | 30 | 2468            | 0.06 (1)                 | 27.28 (28)                 |
|                               | Age        | 0.08  | -0.28                   | 0.45        | 0.002  | 0.005 | .6    | 32 | 2756            | 0.19 (1)                 | 28.77 (30)                 |
|                               | Medication | 0.27  | -0.14                   | 0.68        | 0.003  | 0.002 | .2    | 23 | 1798            | 1.70 (1)                 | 21.72 (21)                 |
| Shifting Comp.                | Severity   | 0.24  | 0.01                    | 0.48        | 0.078  | 0.039 | .044* | 63 | 4600            | 4.06 (1)                 | 64.51 (61)                 |
|                               | Age        | 0.27  | 0.04                    | 0.49        | 0.006  | 0.003 | .021* | 69 | 5116            | 5.29 (1)                 | 69.35 (67)                 |
|                               | Medication | 0.14  | -0.10                   | 0.39        | 0.001  | 0.001 | .3    | 60 | 4170            | 1.29 (1)                 | 61.13 (58)                 |
| <b>Verbal Working Memory:</b> |            |       |                         |             |        |       |       |    |                 |                          |                            |
| Forward Digit Span            | Severity   | -0.02 | -0.42                   | 0.38        | -0.006 | 0.064 | .9    | 26 | 1737            | 0.01 (1)                 | 24.01 (24)                 |
|                               | Age        | -0.11 | -0.50                   | 0.28        | -0.003 | 0.005 | .6    | 27 | 1782            | 0.31 (1)                 | 24.82 (25)                 |
|                               | Medication | 0.48  | 0.10                    | 0.86        | 0.004  | 0.002 | .012* | 23 | 1526            | 6.25 (1)                 | 20.66 (21)                 |
| Backward Digit Span           | Severity   | 0.42  | 0.05                    | 0.80        | 0.175  | 0.080 | .028* | 21 | 1530            | 4.81 (1)                 | 21.88 (19)                 |
|                               | Age        | -0.02 | -0.42                   | 0.39        | -0.001 | 0.006 | .9    | 23 | 1662            | 0.01 (1)                 | 23.3 (21)                  |
|                               | Medication | 0.30  | -0.13                   | 0.72        | 0.003  | 0.003 | .2    | 19 | 1254            | 1.85 (1)                 | 19.01 (17)                 |
| Maintenance Comp.             | Severity   | -0.02 | -0.39                   | 0.35        | -0.006 | 0.056 | .9    | 30 | 2010            | 0.01 (1)                 | 28.16 (28)                 |
|                               | Age        | -0.05 | -0.41                   | 0.32        | -0.001 | 0.004 | .8    | 31 | 2055            | 0.06 (1)                 | 29.05 (29)                 |
|                               | Medication | 0.48  | 0.14                    | 0.83        | 0.004  | 0.001 | .006* | 27 | 1799            | 7.51 (1)                 | 24.71 (25)                 |
| Manipulation Comp.            | Severity   | 0.47  | 0.13                    | 0.82        | 0.171  | 0.063 | .007* | 24 | 1811            | 7.30 (1)                 | 25.22 (22)                 |
|                               | Age        | -0.18 | -0.54                   | 0.18        | -0.004 | 0.005 | .3    | 27 | 2051            | 0.94 (1)                 | 28.14 (25)                 |
|                               | Medication | 0.32  | -0.06                   | 0.71        | 0.003  | 0.002 | .1    | 23 | 1643            | 2.67 (1)                 | 22.93 (21)                 |
| Verbal WM Comp.               | Severity   | 0.21  | -0.11                   | 0.52        | 0.060  | 0.047 | .2    | 36 | 2840            | 5.88 (2)                 | 33.66 (33)                 |
|                               | Task       | 0.29  | -0.03                   | 0.61        | 0.136  | 0.077 | .076# |    |                 |                          |                            |

|                                     |            |       |       |      |        |       |        |    |      |           |            |
|-------------------------------------|------------|-------|-------|------|--------|-------|--------|----|------|-----------|------------|
|                                     | Age        | -0.12 | -0.42 | 0.18 | -0.002 | 0.003 | .4     | 39 | 2840 | 5.56 (2)  | 36.78 (36) |
|                                     | Task       | 0.34  | 0.04  | 0.65 | 0.154  | 0.069 | .025*  |    |      |           |            |
|                                     | Medication | 0.46  | 0.13  | 0.78 | 0.003  | 0.001 | .006*  | 33 | 2840 | 13.04 (2) | 29.93 (30) |
|                                     | Task       | 0.18  | -0.15 | 0.50 | 0.073  | 0.069 | .3     |    |      |           |            |
| <b>Visuospatial Working Memory:</b> |            |       |       |      |        |       |        |    |      |           |            |
| Visuospatial WM Comp.               | Severity   | 0.29  | -0.13 | 0.71 | 0.088  | 0.064 | .2     | 21 | 1382 | 1.87 (1)  | 20.25 (19) |
|                                     | Age        | 0.09  | -0.32 | 0.51 | 0.002  | 0.005 | .7     | 23 | 1455 | 0.20 (1)  | 21.87 (21) |
|                                     | Medication | 0.48  | 0.06  | 0.91 | 0.004  | 0.002 | .026*  | 19 | 1121 | 4.94 (1)  | 16.34 (17) |
| <b>Verbal Fluency:</b>              |            |       |       |      |        |       |        |    |      |           |            |
| Semantic VF                         | Severity   | 0.62  | 0.30  | 0.94 | 0.288  | 0.076 | <.001* | 24 | 1643 | 14.33 (1) | 22.77 (22) |
|                                     | Age        | -0.29 | -0.66 | 0.09 | -0.008 | 0.006 | .1     | 24 | 1643 | 2.23 (1)  | 25.22 (22) |
|                                     | Medication | 0.07  | -0.42 | 0.56 | 0.001  | 0.004 | .8     | 17 | 1096 | 0.08 (1)  | 16.08 (15) |
| Phonemic VF                         | Severity   | 0.50  | 0.20  | 0.80 | 0.155  | 0.047 | .001*  | 34 | 2555 | 10.83 (1) | 32.01 (23) |
|                                     | Age        | 0.08  | -0.25 | 0.41 | 0.002  | 0.004 | .6     | 37 | 2850 | 0.22 (1)  | 35.34 (35) |
|                                     | Medication | 0.01  | -0.35 | 0.37 | 0.000  | 0.002 | .9     | 31 | 2131 | 0.00 (1)  | 29.79 (29) |
| VF Comp.                            | Severity   | 0.48  | 0.22  | 0.74 | 0.162  | 0.044 | <.001* | 43 | 3466 | 16.42 (2) | 40.85 (40) |
|                                     | Task       | 0.26  | 0.00  | 0.52 | 0.121  | 0.053 | .053#  |    |      |           |            |
|                                     | Age        | -0.04 | -0.33 | 0.24 | -0.001 | 0.003 | .8     | 46 | 3466 | 2.30 (2)  | 45.02 (43) |
|                                     | Task       | 0.22  | -0.07 | 0.50 | 0.108  | 0.073 | .1     |    |      |           |            |
|                                     | Medication | 0.01  | -0.32 | 0.35 | 0.000  | 0.002 | .9     | 36 | 3466 | 2.05 (2)  | 35.04 (33) |
|                                     | Task       | 0.23  | -0.10 | 0.57 | 0.140  | 0.103 | .2     |    |      |           |            |
| <b>Comparison Measures:</b>         |            |       |       |      |        |       |        |    |      |           |            |
| Psychomotor Speed Comp.             | Severity   | 0.31  | -0.11 | 0.72 | 0.130  | 0.089 | .1     | 21 | 1557 | 2.11 (1)  | 20.58 (19) |
|                                     | Age        | 0.27  | -0.14 | 0.68 | 0.007  | 0.005 | .2     | 23 | 1742 | 1.66 (1)  | 21.34 (21) |
|                                     | Medication | 0.19  | -0.26 | 0.63 | 0.002  | 0.002 | .4     | 20 | 1529 | 0.69 (1)  | 18.78 (18) |
| Digit-Symbol Substitution           | Severity   | 0.44  | 0.07  | 0.81 | 0.248  | 0.106 | .019*  | 22 | 1857 | 5.46 (1)  | 22.99 (20) |
|                                     | Age        | 0.37  | -0.01 | 0.74 | 0.012  | 0.006 | .059#  | 23 | 1944 | 3.57 (1)  | 23.28 (21) |
|                                     | Medication | 0.40  | -0.01 | 0.81 | 0.006  | 0.003 | .058#  | 19 | 1601 | 3.59 (1)  | 19.30 (17) |
| Vocabulary                          | Severity   | 0.45  | 0.13  | 0.76 | 0.102  | 0.037 | .005*  | 33 | 2057 | 7.75 (1)  | 31.02 (31) |
|                                     | Age        | 0.40  | 0.09  | 0.71 | 0.009  | 0.004 | .013*  | 36 | 2175 | 6.23 (1)  | 33.32 (34) |
|                                     | Medication | -0.14 | -0.50 | 0.22 | -0.001 | 0.001 | .4     | 32 | 1986 | 0.58 (1)  | 28.79 (30) |

Note. Comp. = composite score; WCST= Wisconsin Card Sorting Test; TMT-B = Trail Making Test part B; TMT-A = Trail Making Test part A;

ID/ED = Intradimensional/Extradimensional; WM = working memory; DMTS = delayed-match-to-sample; VF = verbal fluency.

\* Significant ( $p < .05$ ). # Marginal ( $p < .10$ ).

Table S4

*Categorical Age Moderator ANOVA Analyses (Older vs. Younger Adults)*

| DV                                  | Group       | Weighted Mean<br>Effect Size ( <i>d</i> ) | 95% Confidence Interval |             | SE   | <i>K</i> | <i>N<sub>ps</sub></i> | <i>Q<sub>w</sub></i> ( <i>df</i> ) | Between Groups<br>Homogeneity Test |                      |
|-------------------------------------|-------------|-------------------------------------------|-------------------------|-------------|------|----------|-----------------------|------------------------------------|------------------------------------|----------------------|
|                                     |             |                                           | Lower Limit             | Upper Limit |      |          |                       |                                    | <i>Q<sub>B</sub></i> ( <i>df</i> ) | <i>p<sub>B</sub></i> |
| <b>Inhibition:</b>                  |             |                                           |                         |             |      |          |                       |                                    |                                    |                      |
| Stroop interference                 | Older (60+) | 0.37                                      | 0.04                    | 0.70        | 0.17 | 5        | 1482                  | 16.52 (18)                         | 0.01 (1)                           | .9                   |
|                                     | Younger     | 0.39                                      | 0.21                    | 0.58        | 0.10 | 15       |                       |                                    |                                    |                      |
| Inhibition Comp.                    | Older (60+) | 0.51                                      | 0.27                    | 0.75        | 0.12 | 11       | 3260                  | 44.09 (46)                         | 0.44 (1)                           | .5                   |
|                                     | Younger     | 0.60                                      | 0.47                    | 0.73        | 0.07 | 37       |                       |                                    |                                    |                      |
| <b>Shifting:</b>                    |             |                                           |                         |             |      |          |                       |                                    |                                    |                      |
| WCST                                | Older (60+) | 0.40                                      | 0.13                    | 0.67        | 0.14 | 7        | 1943                  | 25.89 (23)                         | 0.37 (1)                           | .5                   |
|                                     | Younger     | 0.50                                      | 0.32                    | 0.68        | 0.09 | 18       |                       |                                    |                                    |                      |
| TMT-B                               | Older (60+) | 0.85                                      | 0.58                    | 1.13        | 0.14 | 8        | 2787                  | 36.27 (33)                         | 4.74 (1)                           | .029*                |
|                                     | Younger     | 0.50                                      | 0.35                    | 0.65        | 0.08 | 27       |                       |                                    |                                    |                      |
| TMT-A (Comparison Condition)        | Older (60+) | 0.54                                      | 0.22                    | 0.86        | 0.16 | 6        | 2756                  | 28.39 (30)                         | 0.03 (1)                           | .9                   |
|                                     | Younger     | 0.51                                      | 0.36                    | 0.67        | 0.08 | 26       |                       |                                    |                                    |                      |
| Shifting Comp.                      | Older (60+) | 0.55                                      | 0.38                    | 0.72        | 0.09 | 16       | 5116                  | 70.32 (67)                         | 1.13 (1)                           | .3                   |
|                                     | Younger     | 0.44                                      | 0.35                    | 0.54        | 0.05 | 53       |                       |                                    |                                    |                      |
| <b>Verbal Working Memory:</b>       |             |                                           |                         |             |      |          |                       |                                    |                                    |                      |
| Forward Digit Span                  | Older (60+) | 0.22                                      | -0.06                   | 0.49        | 0.14 | 6        | 1782                  | 24.86 (25)                         | 2.14 (1)                           | .144                 |
|                                     | Younger     | 0.45                                      | 0.29                    | 0.60        | 0.08 | 21       |                       |                                    |                                    |                      |
| Maintenance Comp.                   | Older (60+) | 0.27                                      | 0.05                    | 0.49        | 0.11 | 8        | 2055                  | 29.16 (29)                         | 1.67 (1)                           | .2                   |
|                                     | Younger     | 0.44                                      | 0.30                    | 0.58        | 0.07 | 23       |                       |                                    |                                    |                      |
| Manipulation Comp.                  | Older (60+) | 0.32                                      | 0.06                    | 0.59        | 0.13 | 6        | 2051                  | 27.83 (25)                         | 2.83 (1)                           | .093#                |
|                                     | Younger     | 0.59                                      | 0.43                    | 0.74        | 0.08 | 21       |                       |                                    |                                    |                      |
| Verbal WM. Comp.                    | Older (60+) | 0.30                                      | 0.12                    | 0.48        | 0.09 | 11       | 2840                  | 36.77 (37)                         | 3.78 (1)                           | .052#                |
|                                     | Younger     | 0.52                                      | 0.39                    | 0.64        | 0.06 | 28       |                       |                                    |                                    |                      |
| <b>Visuospatial Working Memory:</b> |             |                                           |                         |             |      |          |                       |                                    |                                    |                      |
| Visuospatial WM Comp.               | Older (60+) | 0.46                                      | 0.15                    | 0.76        | .016 | 5        | 1455                  | 21.82 (21)                         | 0.00 (1)                           | .9                   |
|                                     | Younger     | 0.45                                      | 0.28                    | 0.62        | 0.09 | 18       |                       |                                    |                                    |                      |
| <b>Verbal Fluency:</b>              |             |                                           |                         |             |      |          |                       |                                    |                                    |                      |
| Semantic VF                         | Older (60+) | 0.53                                      | 0.21                    | 0.85        | 0.16 | 7        | 1643                  | 25.09 (22)                         | 1.53 (1)                           | .2                   |
|                                     | Younger     | 0.77                                      | 0.56                    | 0.98        | 0.11 | 17       |                       |                                    |                                    |                      |
| Phonemic VF                         | Older (60+) | 0.48                                      | 0.29                    | 0.66        | 0.09 | 14       | 2850                  | 35.48 (35)                         | 0.07 (1)                           | .8                   |
|                                     | Younger     | 0.45                                      | 0.29                    | 0.60        | 0.08 | 23       |                       |                                    |                                    |                      |
| VF Comp.                            | Older (60+) | 0.50                                      | 0.32                    | 0.69        | 0.09 | 16       | 3466                  | 45.15 (44)                         | 0.40 (1)                           | .5                   |
|                                     | Younger     | 0.58                                      | 0.44                    | 0.72        | 0.07 | 30       |                       |                                    |                                    |                      |
| <b>Comparison Measures:</b>         |             |                                           |                         |             |      |          |                       |                                    |                                    |                      |
| Digit-Symbol Substitution           | Older (60+) | 0.81                                      | 0.44                    | 1.18        | 0.19 | 8        | 1944                  | 23.59 (21)                         | 1.71 (1)                           | .2                   |
|                                     | Younger     | 0.50                                      | 0.22                    | 0.77        | 0.14 | 15       |                       |                                    |                                    |                      |
| Psychomotor Speed Comp.             | Older (60+) | 0.40                                      | 0.02                    | 0.77        | 0.19 | 5        | 1743                  | 21.94 (21)                         | 0.17 (1)                           | .7                   |
|                                     | Younger     | 0.31                                      | 0.10                    | 0.51        | 0.10 | 18       |                       |                                    |                                    |                      |

|            |             |      |       |      |      |    |      |            |          |       |
|------------|-------------|------|-------|------|------|----|------|------------|----------|-------|
| Vocabulary | Older (60+) | 0.39 | 0.13  | 0.64 | 0.13 | 6  | 2175 | 32.94 (34) | 4.22 (1) | .040* |
|            | Younger     | 0.10 | -0.01 | 0.20 | 0.06 | 30 |      |            |          |       |

*Note.* Comp. = composite score; WCST= Wisconsin Card Sorting Test; TMT-B = Trail Making Test part B; TMT-A = Trail Making Test part A; WM

= working memory; VF = verbal fluency.

\* Significant ( $p < .05$ ). # Marginal ( $p < .10$ ).



Table S5

*Mean Effect Size Analyses for IQ and Education Matched Samples Only*

| Measure                               | N    | k  | Weighted Mean<br>Effect Size (d) | 95% Confidence<br>Interval |                | SE   | Z     | p     | Homogeneity Test |       |    |       |                |
|---------------------------------------|------|----|----------------------------------|----------------------------|----------------|------|-------|-------|------------------|-------|----|-------|----------------|
|                                       |      |    |                                  | Lower<br>Limit             | Upper<br>Limit |      |       |       | v                | Q     | df | p     | I <sup>2</sup> |
| <b>Inhibition:</b>                    |      |    |                                  |                            |                |      |       |       |                  |       |    |       |                |
| Stroop Incongruent                    | 644  | 10 | 0.88                             | 0.71                       | 1.05           | 0.08 | 10.33 | <.001 | 0.00             | 5.03  | 9  | .8    | 0.00           |
| Stroop Neutral (Comparison Condition) | 333  | 5  | 0.68                             | 0.46                       | 0.91           | 0.12 | 5.85  | <.001 | 0.00             | 1.00  | 4  | .9    | 0.00           |
| Stroop Interference                   | 553  | 7  | 0.47                             | 0.19                       | 0.75           | 0.14 | 3.26  | .001  | 0.08             | 14.67 | 6  | .023  | 59.13          |
| Inhibition Comp.                      | 1047 | 15 | 0.62                             | 0.43                       | 0.79           | 0.09 | 6.74  | <.001 | 0.09             | 26.10 | 14 | <.001 | 46.36          |
| <b>Shifting:</b>                      |      |    |                                  |                            |                |      |       |       |                  |       |    |       |                |
| WCST                                  | 862  | 11 | 0.43                             | 0.26                       | 0.61           | 0.09 | 4.80  | <.001 | 0.03             | 14.55 | 10 | .2    | 31.27          |
| TMT-B                                 | 929  | 12 | 0.35 <sup>^</sup>                | 0.13                       | 0.58           | 0.11 | 3.11  | .002  | 0.09             | 26.41 | 11 | .006  | 58.35          |
| TMT-A (Comparison Condition)          | 941  | 12 | 0.37 <sup>^</sup>                | 0.13                       | 0.61           | 0.12 | 3.01  | .003  | 0.11             | 30.72 | 11 | .001  | 64.19          |
| ID/ED Shift                           | 475  | 8  | 0.41                             | 0.18                       | 0.64           | 0.12 | 3.45  | .001  | 0.03             | 10.16 | 7  | .2    | 11.42          |
| Shifting Comp.                        | 1888 | 28 | 0.40                             | 0.28                       | 0.52           | 0.06 | 6.53  | <.001 | 0.04             | 40.96 | 27 | .042  | 34.08          |
| <b>Verbal Working Memory:</b>         |      |    |                                  |                            |                |      |       |       |                  |       |    |       |                |
| Forward Digit Span                    | 1046 | 15 | 0.42                             | 0.22                       | 0.61           | 0.10 | 4.15  | <.001 | 0.08             | 30.29 | 14 | .007  | 53.78          |
| Backward Digit Span                   | 900  | 12 | 0.46                             | 0.24                       | 0.67           | 0.11 | 4.10  | <.001 | 0.08             | 25.25 | 11 | .008  | 56.44          |
| Maintenance Comp.                     | 1121 | 16 | 0.40                             | 0.22                       | 0.59           | 0.09 | 4.34  | <.001 | 0.07             | 30.41 | 15 | .011  | 50.67          |
| Manipulation Comp.                    | 949  | 13 | 0.43                             | 0.22                       | 0.64           | 0.11 | 3.99  | <.001 | 0.08             | 28.19 | 12 | .005  | 57.43          |
| Verbal WM Comp.                       | 1375 | 19 | 0.40                             | 0.25                       | 0.56           | 0.08 | 5.15  | <.001 | 0.05             | 32.35 | 18 | .020  | 44.36          |
| <b>Visuospatial Working Memory:</b>   |      |    |                                  |                            |                |      |       |       |                  |       |    |       |                |
| DMTS                                  | 325  | 6  | 0.40                             | 0.16                       | 0.64           | 0.12 | 3.21  | .001  | 0.01             | 5.86  | 5  | .3    | 14.68          |
| Self-Ordered Pointing                 | 396  | 6  | 0.33                             | -0.02                      | 0.68           | 0.18 | 1.84  | .065  | 0.12             | 13.59 | 5  | .019  | 63.21          |
| Forward Spatial Span                  | 537  | 9  | 0.21                             | -0.02                      | 0.43           | 0.11 | 1.80  | .071  | 0.04             | 12.28 | 8  | .1    | 34.85          |
| Backward Spatial Span                 | 360  | 5  | 0.75                             | 0.23                       | 1.27           | 0.27 | 2.82  | .005  | 0.27             | 19.84 | 4  | .001  | 79.84          |
| Visuospatial WM Comp.                 | 795  | 12 | 0.47                             | 0.24                       | 0.69           | 0.12 | 4.05  | .0001 | 0.08             | 24.76 | 11 | .010  | 55.57          |
| <b>Planning:</b>                      |      |    |                                  |                            |                |      |       |       |                  |       |    |       |                |
| Planning Comp.                        | 527  | 8  | 0.29                             | 0.01                       | 0.57           | 0.14 | 2.01  | .045  | 0.10             | 17.06 | 7  | .017  | 58.97          |
| <b>Verbal Fluency:</b>                |      |    |                                  |                            |                |      |       |       |                  |       |    |       |                |
| Semantic VF                           | 456  | 8  | 0.75                             | 0.54                       | 0.97           | 0.11 | 6.91  | <.001 | 0.01             | 8.14  | 7  | .3    | 14.00          |
| Phonemic VF                           | 1167 | 17 | 0.44                             | 0.31                       | 0.57           | 0.07 | 6.67  | <.001 | 0.01             | 17.62 | 16 | .3    | 9.19           |
| VF Comp.                              | 1226 | 18 | 0.51                             | 0.39                       | 0.63           | 0.06 | 8.09  | <.001 | 0.00             | 17.85 | 17 | .4    | 4.76           |
| <b>Comparison Measures:</b>           |      |    |                                  |                            |                |      |       |       |                  |       |    |       |                |
| Psychomotor Speed Comp.               | 646  | 9  | 0.30                             | -0.08                      | 0.68           | 0.19 | 1.53  | .125  | 0.27             | 41.43 | 8  | <.001 | 80.69          |
| Digit-Symbol Substitution             | 703  | 9  | 0.30 <sup>^</sup>                | 0.07                       | 0.52           | 0.11 | 2.60  | .009  | 0.05             | 14.73 | 8  | .065  | 45.69          |

Note. Comp. = composite score; WCST= Wisconsin Card Sorting Test; TMT-B = Trail Making Test part B; TMT-A = Trail Making Test part A;

ID/ED = Intradimensional/Extradimensional. <sup>^</sup> Significant reduction in effect size compared to analysis with all samples included.

Table S6

*Mean Effect Size Analyses for Medication-Free Samples Only*

| Measure                               | N    | k  | Weighted Mean<br>Effect Size ( <i>d</i> ) | 95% Confidence Interval |             | SE   | Z    | <i>p</i> | Homogeneity Test |       |    |          |                |
|---------------------------------------|------|----|-------------------------------------------|-------------------------|-------------|------|------|----------|------------------|-------|----|----------|----------------|
|                                       |      |    |                                           | Lower Limit             | Upper Limit |      |      |          | <i>v</i>         | Q     | df | <i>p</i> | I <sup>2</sup> |
| <b>Inhibition:</b>                    |      |    |                                           |                         |             |      |      |          |                  |       |    |          |                |
| Stroop Incongruent                    | 505  | 7  | 0.69                                      | 0.36                    | 1.02        | 0.17 | 4.06 | <.001    | 0.14             | 17.35 | 6  | .008     | 65.42          |
| Stroop Neutral (Comparison Condition) | 423  | 5  | 0.56                                      | 0.29                    | 0.84        | 0.14 | 4.05 | .0001    | 0.04             | 6.77  | 4  | .1       | 40.92          |
| Stroop Interference                   | 397  | 6  | 0.42                                      | 0.05                    | 0.80        | 0.19 | 2.23 | .026     | 0.14             | 14.89 | 5  | .011     | 66.42          |
| Inhibition Comp.                      | 870  | 13 | 0.54                                      | 0.30                    | 0.78        | 0.12 | 4.42 | <.001    | 0.11             | 32.55 | 12 | .001     | 63.13          |
| <b>Shifting:</b>                      |      |    |                                           |                         |             |      |      |          |                  |       |    |          |                |
| WCST                                  | 805  | 8  | 0.45                                      | 0.19                    | 0.72        | 0.14 | 3.35 | .001     | 0.09             | 20.60 | 7  | .004     | 66.02          |
| TMT-B                                 | 706  | 10 | 0.57                                      | 0.32                    | 0.83        | 0.13 | 4.38 | <.001    | 0.10             | 21.44 | 9  | .011     | 58.02          |
| TMT-A (Comparison Condition)          | 631  | 8  | 0.43                                      | 0.10                    | 0.77        | 0.17 | 2.52 | .012     | 0.17             | 26.08 | 7  | .001     | 73.16          |
| Shifting Comp. <sup>a</sup>           | 1410 | 18 | 0.42                                      | 0.27                    | 0.57        | 0.08 | 5.46 | <.001    | 0.04             | 29.43 | 17 | .031     | 42.24          |
| <b>Verbal Working Memory:</b>         |      |    |                                           |                         |             |      |      |          |                  |       |    |          |                |
| Forward Digit Span                    | 529  | 7  | 0.23                                      | 0.01                    | 0.45        | 0.11 | 2.03 | .042     | 0.02             | 7.81  | 6  | .3       | 23.18          |
| Maintenance Comp.                     | 663  | 8  | 0.23                                      | 0.05                    | 0.41        | 0.09 | 2.48 | .013     | 0.01             | 8.22  | 7  | .3       | 14.84          |
| Verbal WM Comp.                       | 712  | 9  | 0.22                                      | 0.06                    | 0.38        | 0.08 | 2.66 | .008     | 0.00             | 8.53  | 8  | .4       | 6.21           |
| <b>Visuospatial Working Memory:</b>   |      |    |                                           |                         |             |      |      |          |                  |       |    |          |                |
| Visuospatial WM Comp.                 | 286  | 5  | 0.27                                      | -0.04                   | 0.57        | 0.16 | 1.70 | .090     | 0.05             | 6.44  | 4  | .2       | 37.89          |
| <b>Verbal Fluency:</b>                |      |    |                                           |                         |             |      |      |          |                  |       |    |          |                |
| Phonemic VF                           | 694  | 9  | 0.49                                      | 0.31                    | 0.67        | 0.09 | 5.41 | <.001    | 0.01             | 9.44  | 8  | .3       | 15.25          |
| VF Comp.                              | 762  | 10 | 0.49                                      | 0.32                    | 0.65        | 0.09 | 5.71 | <.001    | 0.01             | 10.58 | 9  | .3       | 14.92          |
| <b>Comparison Measures:</b>           |      |    |                                           |                         |             |      |      |          |                  |       |    |          |                |
| Psychomotor Speed Comp.               | 577  | 7  | 0.18                                      | -0.26                   | 0.61        | 0.22 | 0.80 | .4       | 0.27             | 36.21 | 6  | <.001    | 77.11          |
| Digit-Symbol Substitution             | 651  | 7  | 0.34                                      | 0.06                    | 0.63        | 0.15 | 2.35 | .019     | 0.09             | 15.69 | 6  | .016     | 61.76          |
| Vocabulary                            | 417  | 7  | 0.17                                      | -0.02                   | 0.37        | 0.10 | 1.73 | .084     | 0.00             | 1.63  | 6  | .9       | 0.00           |

Note. Comp.= composite score; WCST= Wisconsin Card Sorting Test; TMT-B = Trail Making Test part B; TMT-A = Trail Making Test part A; ID/ED

= Intradimensional/Extradimensional; WM = working memory. DMTS = delayed-match-to-sample. VF = verbal fluency.

<sup>a</sup> One outlier (*d* = 2.96) excluded. With this outlier included weighted mean effect size *d* = 0.53.

## Supplementary Figures

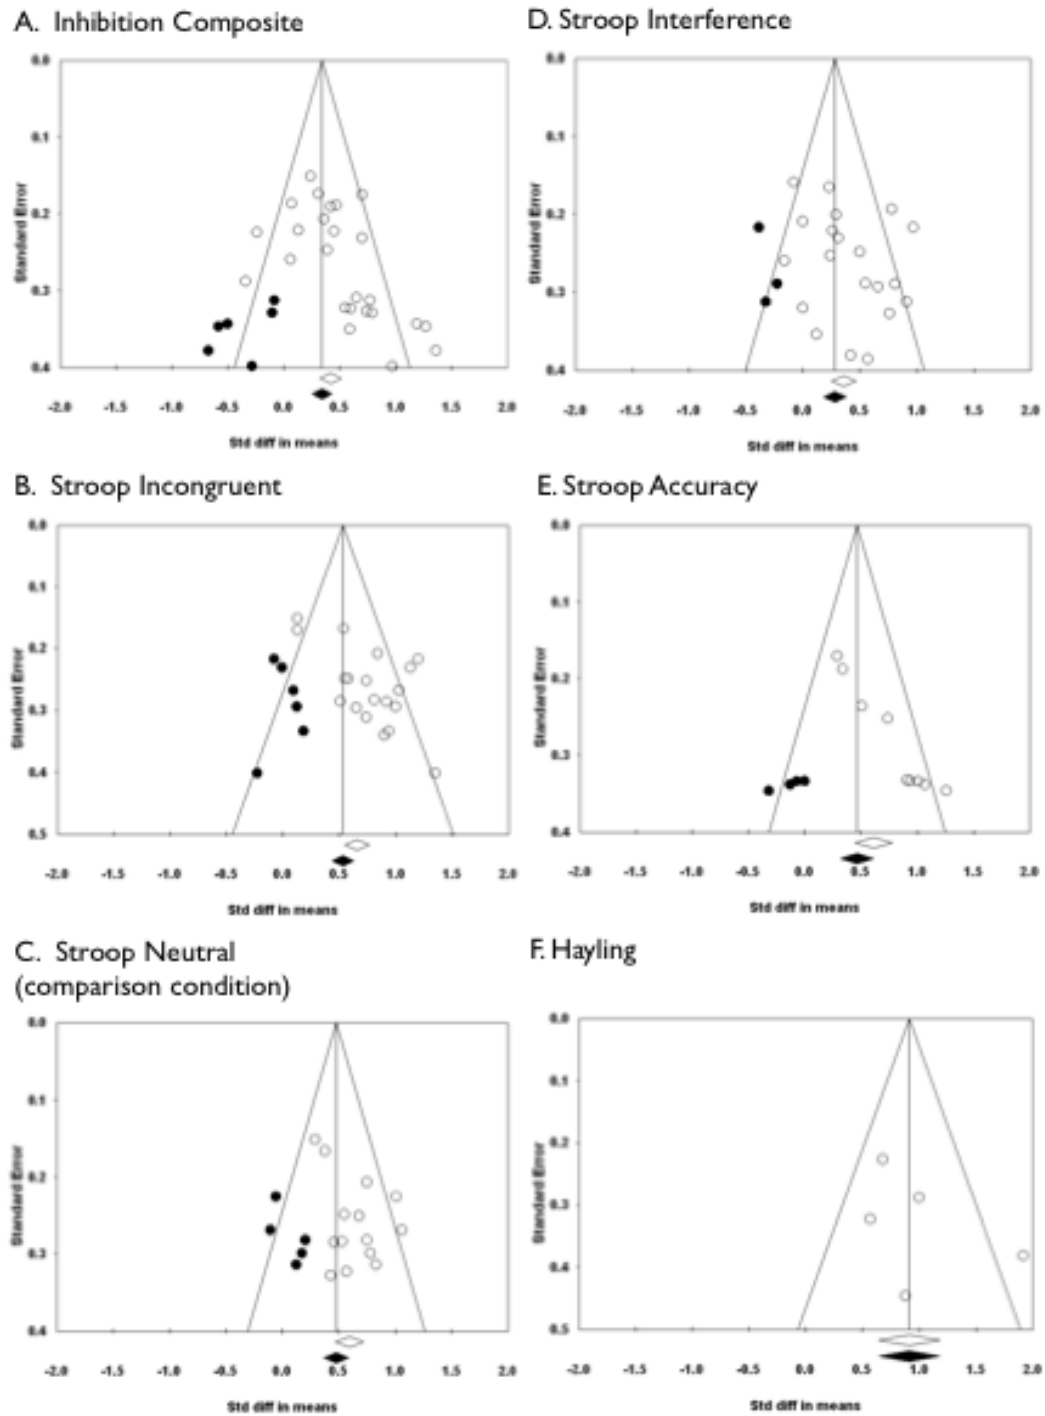

Figure S1. Funnel plots for effect sizes in inhibition measure analyses. Vertical lines indicate the weighted mean effect size for each analysis. Clear circles indicate actual data points and black circles indicate imputed data points from the trim and fill analyses.

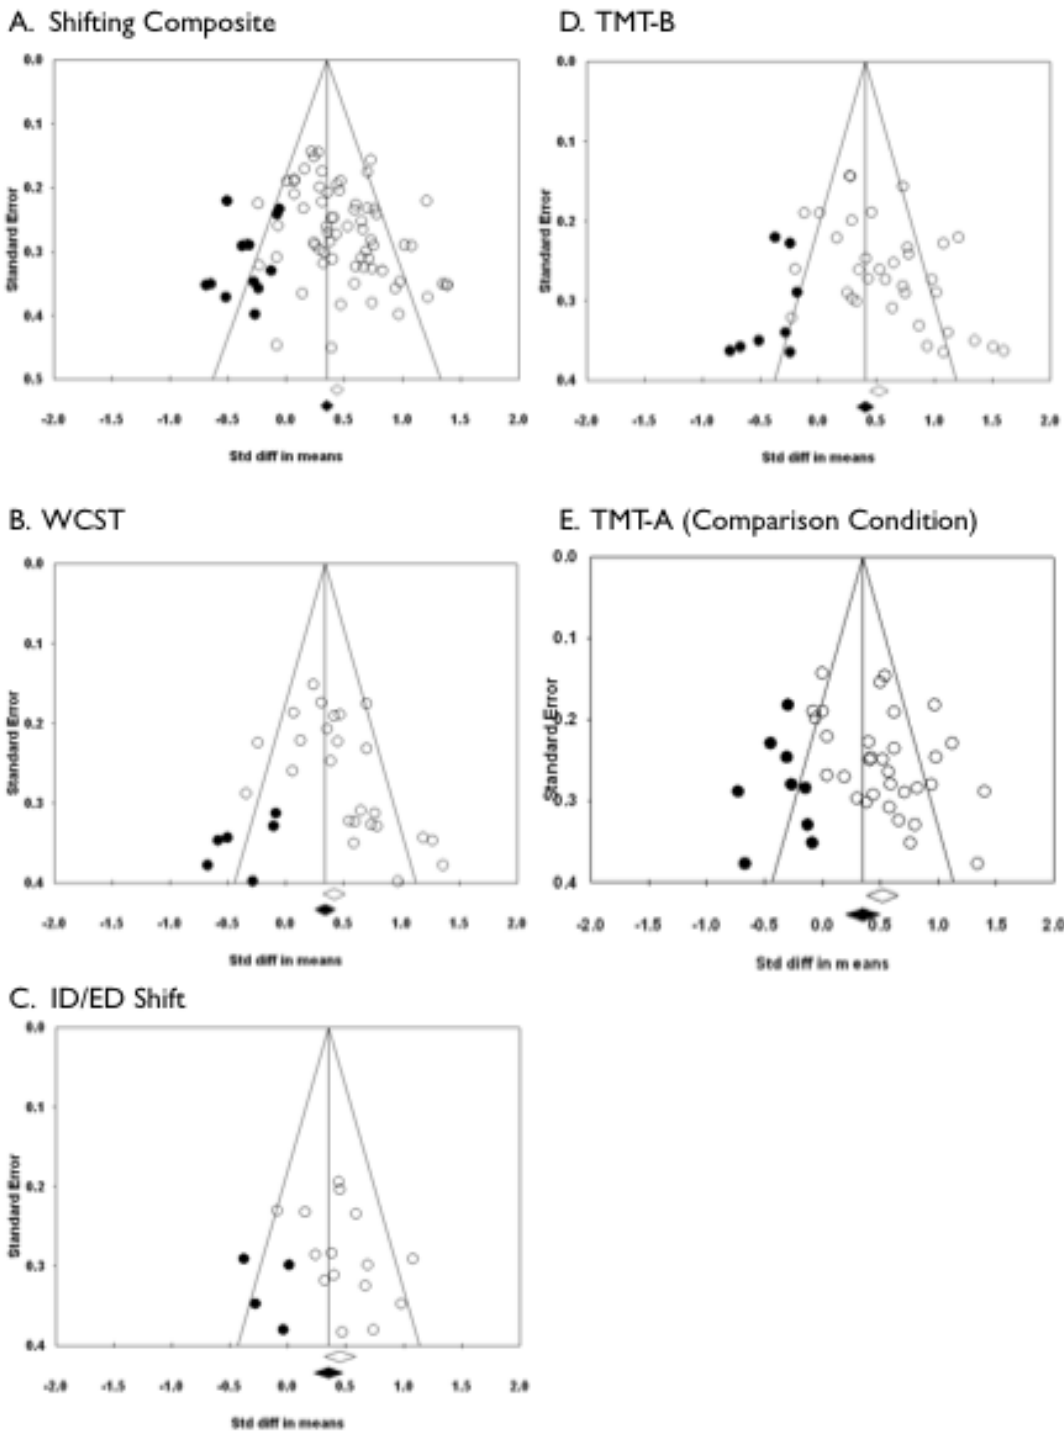

Figure S2. Funnel plots for effect sizes in shifting measure analyses. Vertical lines indicate the weighted mean effect size for each analysis. Clear circles indicate actual data points and black circles indicate imputed data points from the trim and fill analyses.

## A. Updating Composite

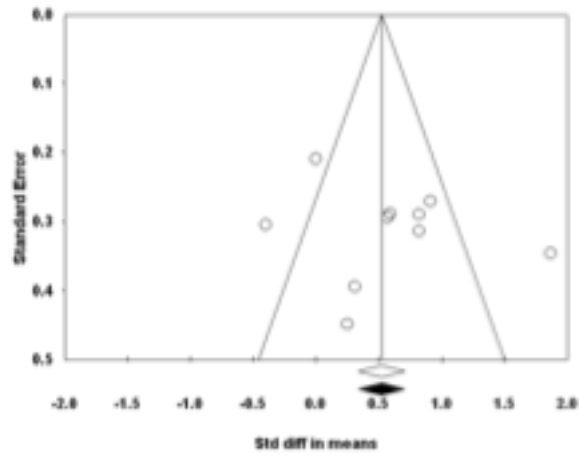

## B. n-Back

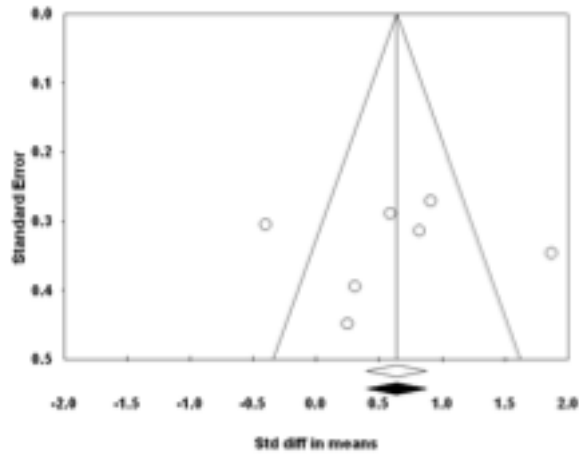

Figure S3. Funnel plots for effect sizes in updating measure analyses. Vertical lines indicate the weighted mean effect size for each analysis. Clear circles indicate actual data points and black circles indicate imputed data points from the trim and fill analyses.

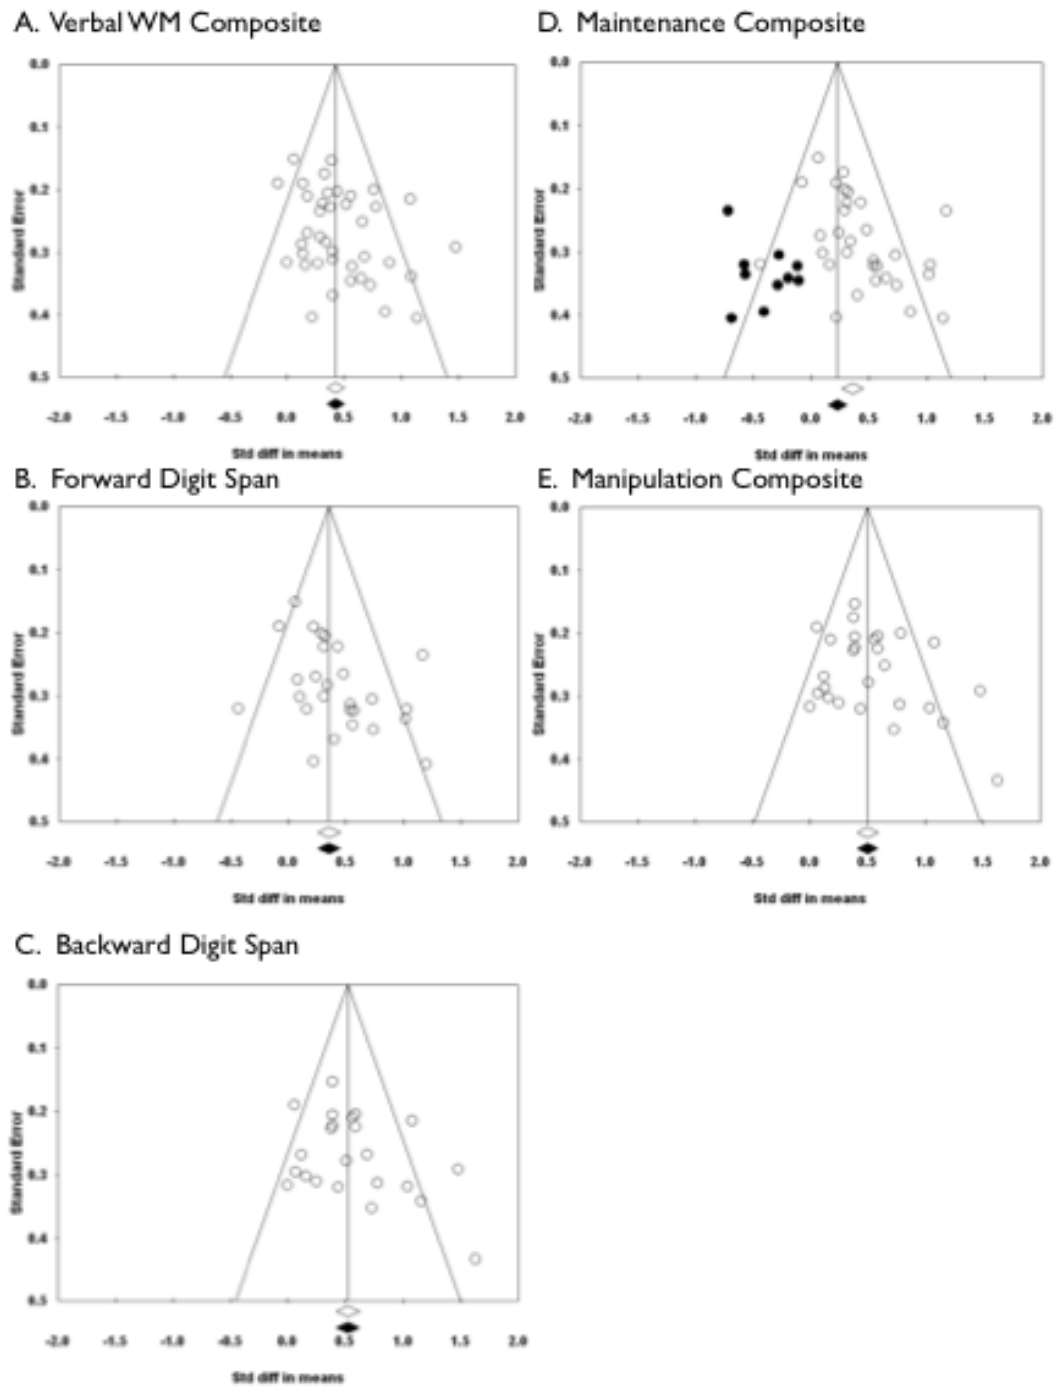

Figure S4. Funnel plots for effect sizes in verbal working memory measure analyses. Vertical lines indicate the weighted mean effect size for each analysis. Clear circles indicate actual data points and black circles indicate imputed data points from the trim and fill analyses.

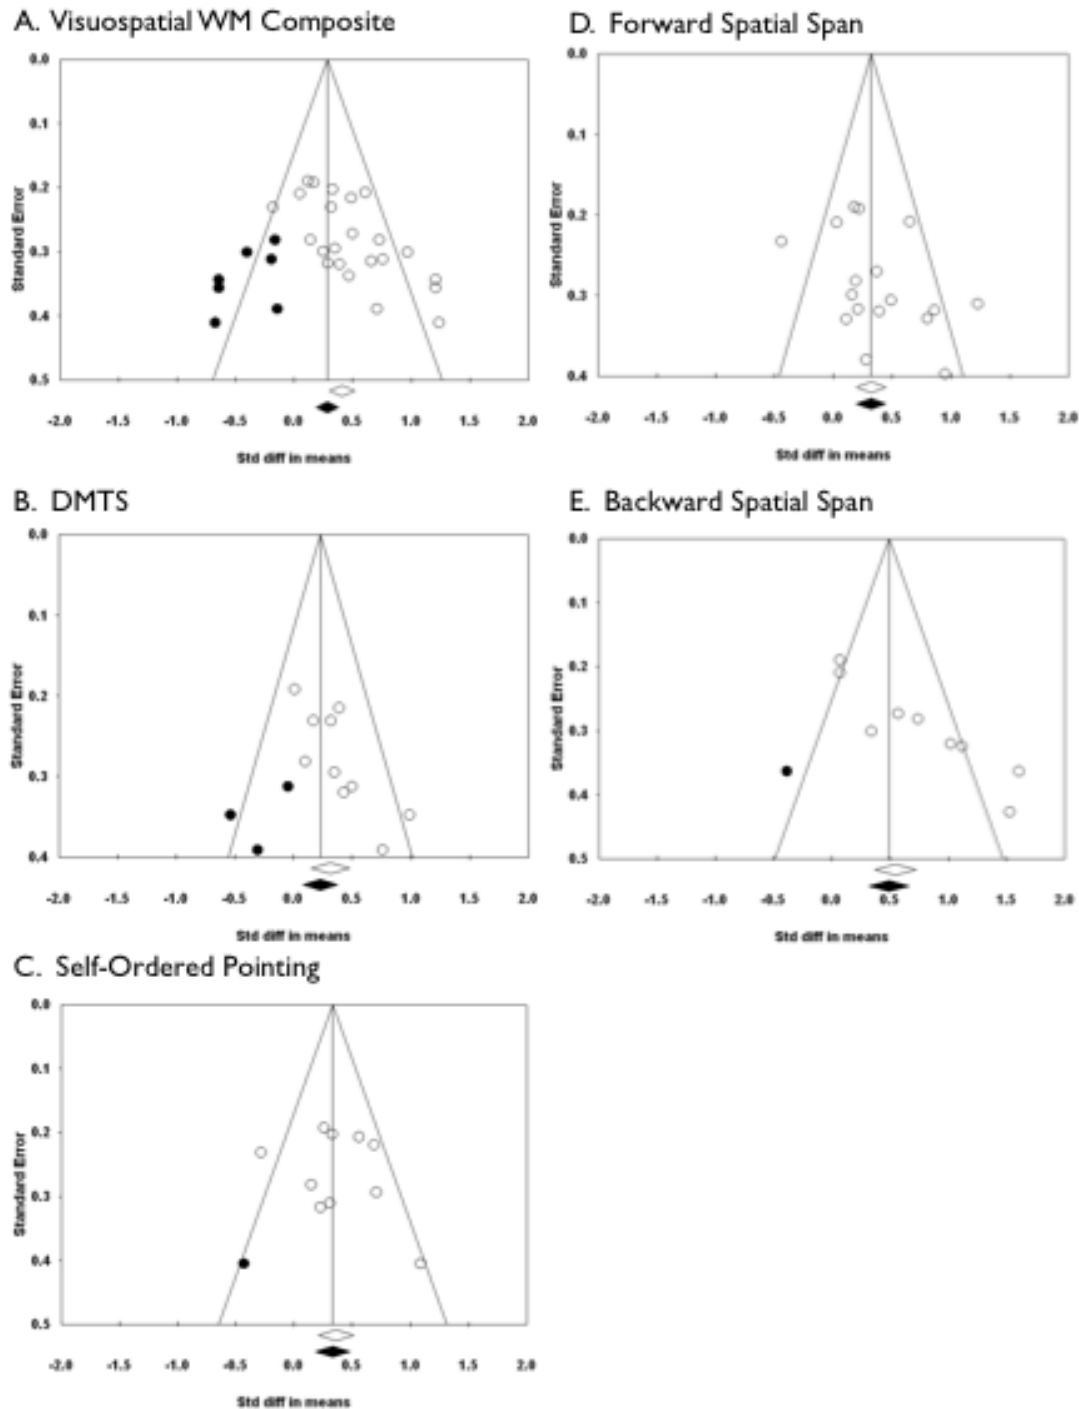

Figure S5. Funnel plots for effect sizes in visuospatial working memory measure analyses. Vertical lines indicate the weighted mean effect size for each analysis. Clear circles indicate actual data points and black circles indicate imputed data points from the trim and fill analyses.

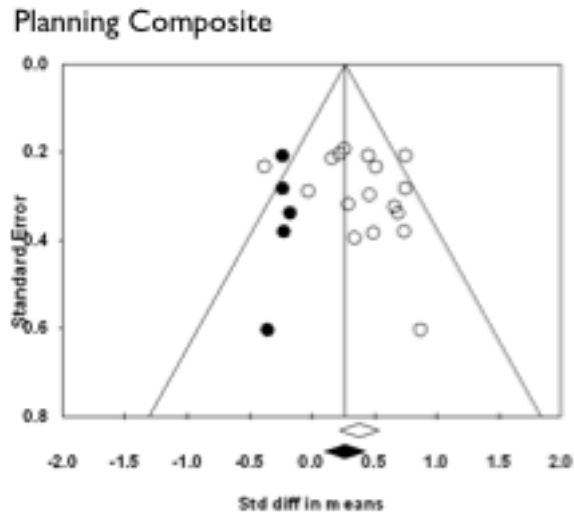

Figure S6. Funnel plot for effect sizes in the planning composite score analysis. The vertical line indicates the weighted mean effect size. The grey box indicates the data point excluded in the trimmed analyses (Table S3): the effect size is robust to trimming this points.



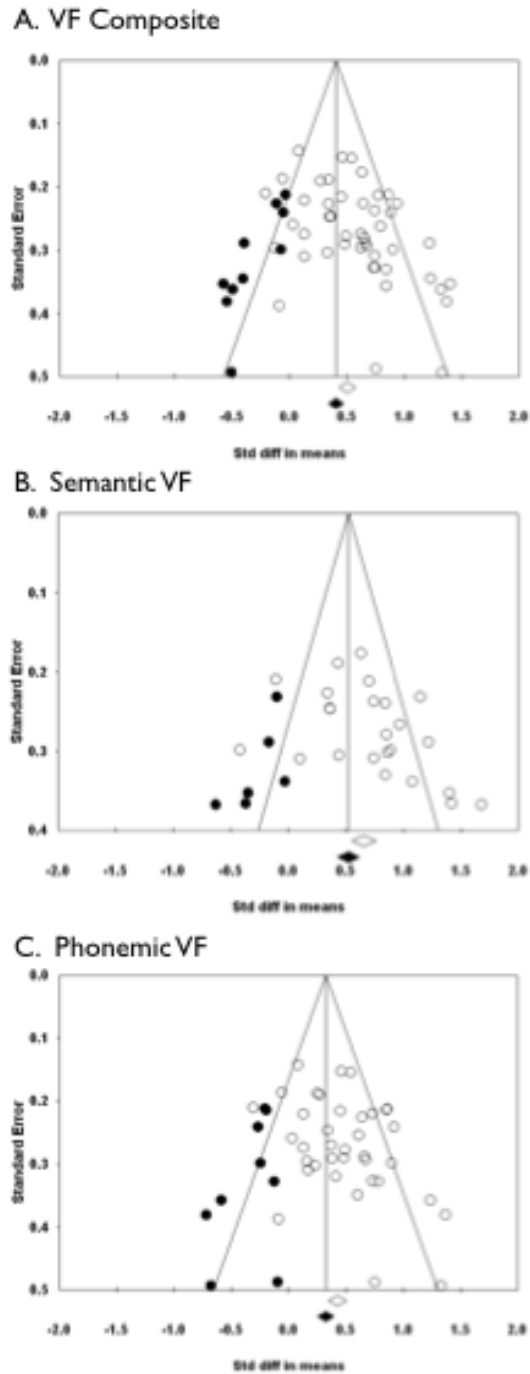

Figure S7. Funnel plots for effect sizes in verbal fluency measure analyses. Vertical lines indicate the weighted mean effect size for each analysis. Clear circles indicate actual data points and black circles indicate imputed data points from the trim and fill analyses.

## A. Psychomotor Speed Composite

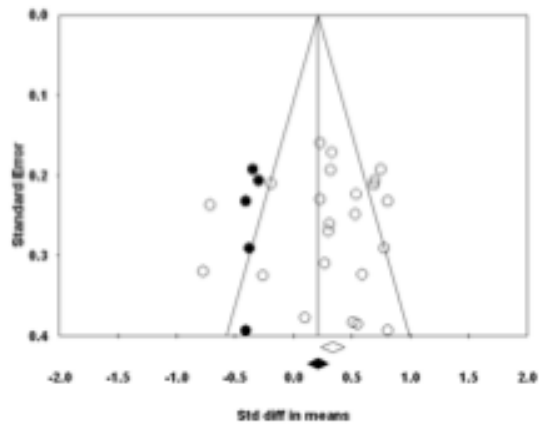

## B. Digit-Symbol Substitution

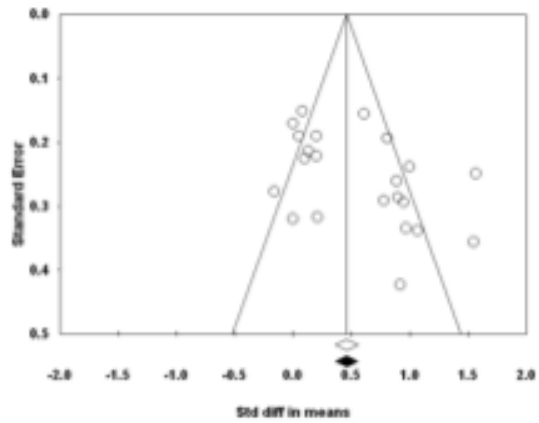

## C. Vocabulary

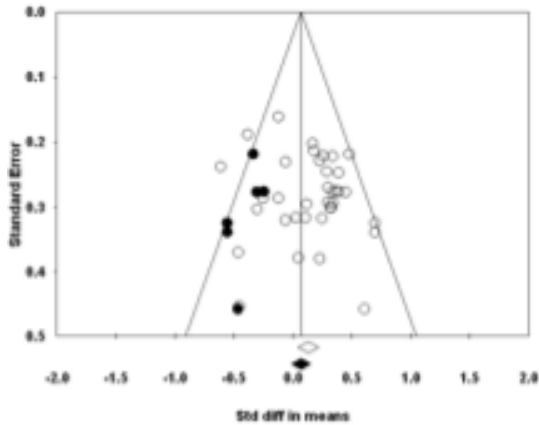

Figure S8. Funnel plots for effect sizes in non-EF comparison measure analyses. Vertical lines indicate the weighted mean effect size for each analysis. Clear circles indicate actual data points and black circles indicate imputed data points from the trim and fill analyses.
